# Supplementary material
Source: publisher figshare collection journal article supplement (https://asha.figshare.com/articles/dataset/_/12420539)
Supplement: Supplementary file 1 [file 1]

**Supplemental Material S10. Descriptive statistics.**

**Parental Dialogic Reading Behavior (Dialogic/Control Group)**

| Condition | Pre-Intervention |           | Post-Intervention |           | Change |           |
|-----------|------------------|-----------|-------------------|-----------|--------|-----------|
|           | Mean             | <i>SD</i> | Mean              | <i>SD</i> | Mean   | <i>SD</i> |
| Dialogic  | 0.411            | 0.217     | 0.708             | 0.196     | 0.297  | 0.260     |
| Control   | 0.424            | 0.231     | 0.387             | 0.245     | -0.037 | 0.258     |

**Parental Pause Reading Behavior (Pause/Control Group)**

| Condition | Pre-Intervention |           | Post-Intervention |           | Change |           |
|-----------|------------------|-----------|-------------------|-----------|--------|-----------|
|           | Mean             | <i>SD</i> | Mean              | <i>SD</i> | Mean   | <i>SD</i> |
| Pause     | 0.170            | 0.124     | 0.586             | 0.284     | 0.292  | 0.249     |
| Control   | 0.251            | 0.171     | 0.235             | 0.181     | -0.037 | 0.189     |

**Expressive Language**

| Condition | Pre-Intervention |           | Post-Intervention |           | Change |           |
|-----------|------------------|-----------|-------------------|-----------|--------|-----------|
|           | Mean             | <i>SD</i> | Mean              | <i>SD</i> | Mean   | <i>SD</i> |
| Pause     | 35.792           | 5.295     | 37.229            | 6.172     | 1.438  | 3.228     |
| Dialogic  | 36.961           | 4.035     | 38.510            | 4.523     | 1.549  | 2.618     |
| Control   | 35.392           | 4.526     | 36.647            | 5.180     | 1.255  | 3.186     |

### Receptive Language

| Condition | Pre-Intervention |           | Post-Intervention |           | Change |           |
|-----------|------------------|-----------|-------------------|-----------|--------|-----------|
|           | Mean             | <i>SD</i> | Mean              | <i>SD</i> | Mean   | <i>SD</i> |
| Pause     | 35.479           | 6.257     | 36.896            | 6.990     | 1.417  | 4.505     |
| Dialogic  | 36.627           | 5.769     | 39.275            | 6.521     | 2.647  | 3.923     |
| Control   | 35.471           | 5.619     | 37.157            | 5.573     | 1.686  | 3.432     |

### CELF Scores

| Condition | Pre-Intervention |           | Post-Intervention |           | Change |           |
|-----------|------------------|-----------|-------------------|-----------|--------|-----------|
|           | Mean             | <i>SD</i> | Mean              | <i>SD</i> | Mean   | <i>SD</i> |
| Pause     | 5.381            | 4.695     | 6.476             | 5.209     | 1.095  | 4.616     |
| Dialogic  | 7.020            | 4.409     | 8.551             | 5.180     | 1.531  | 3.367     |
| Control   | 5.833            | 3.905     | 7.167             | 4.469     | 1.333  | 3.943     |

### MLU

| Condition | Pre-Intervention |           | Post-Intervention |           | Change |           |
|-----------|------------------|-----------|-------------------|-----------|--------|-----------|
|           | Mean             | <i>SD</i> | Mean              | <i>SD</i> | Mean   | <i>SD</i> |
| Pause     | 2.583            | 0.767     | 2.663             | 0.710     | 0.079  | 0.592     |
| Dialogic  | 2.653            | 0.467     | 2.959             | 0.641     | 0.306  | 0.428     |
| Control   | 2.676            | 0.702     | 2.668             | 0.770     | -0.008 | 0.484     |
