# Supplementary material
Source: publisher figshare collection journal article supplement (https://asha.figshare.com/articles/dataset/_/12420539)
Supplement: Supplementary file 3 [file 1]

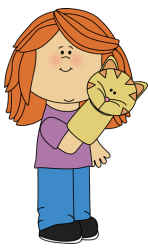

Participant Number

.....

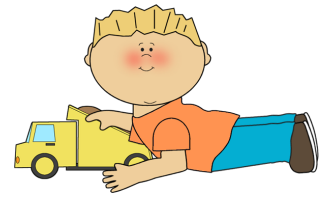

## Family Questionnaire

A child's health and family life can have a big influence on the language they learn. So we would like to ask a few questions about these. Please feel free to leave out any questions that you don't want to answer. **Please do not write your name or address on any part of this questionnaire so that the information is anonymous and confidential.**

### A. YOUR CHILD'S HEALTH AND DEVELOPMENT

1. At what week of pregnancy was your child born?      Week 33 or before          Week 34 to 36          Week 37 or later   

2. How much did your child weigh at birth?      Up to 5lb 8 oz          5lb 9oz to 9lb 14oz          9lb 15 oz or over   

3. Has your child had an ear infection/glue ear for longer than 3 months, 4-6 ear infections with a 6 month period or another identified hearing problem (e.g. at newborn screening)?      Yes          No     

If yes, please give details

4. Is there anyone in the immediate family (brothers/sisters/parents only) with a speech or language difficulty, or dyslexia      Yes          No     

If yes, please give details

5. Does your child have a developmental disability (e.g. Cerebral Palsy, ASD, Fragile X syndrome, Muscular dystrophy, Di George syndrome, Down syndrome, Williams syndrome)?      Yes          No     

If yes, please give details

6. Does your child have a hearing or visual impairment      Yes          No     

If yes, please give details

### B. YOUR CHILD'S FAMILY

1. Your relationship to your child. Are you?      Mum          Dad      
Other          If other, please specify:

2. How many siblings (brothers and sisters) does your child have (include full and half siblings)      0 (zero)          1          2      
3          4 or more   

3. Is this child the first child of his/her mum?      Yes          No     

If not, how many older children does mum have?      1          2          3 or more   

4. Is your child a twin/multiple birth      Yes          No     

5. Is your child:      White British/Irish          Mixed Ethnicity:          Asian/Asian British      
Black/African/Caribbean/Black British          White and other      Other ethnic group (please give details):

6. What is the postcode of your child's main address:

7. How long does your child spend at this address:

- Less than half the year     
  Half the year     
  More than half the year     
  All year

8. Which other adults (over 18 years old) live in this home with your child?

- Mum     Dad     Grandparents     Other adults (please say how many)
- 0     1     2     3     4 or more

9. How many other children live in this home (please say how many in each age range)?

- Children 0 to 4 years     
  0     1     2     3     4 or more
- Children 5 to 17 years     
  0     1     2     3     4 or more

10. How many bedrooms are in this home?

- 1     2     3     4     5 or more

**Please only answer questions 11 and 12 if your child lives at another home for part of the year**

11. How long does your child spend at this other address:

- Less than half the year     
  Half the year     
  More than half the year     
  All year

12. Which other adults (over 18 years old) live in this home with your child?

- Mum     Dad     Grandparents     Other adults

### Child's Mum

Please fill in questions 13 and 14 for the child's mum

NB: If child lives with two mums, please fill in for the mum with the highest qualification. If child lives with two dads (and not mum), please fill in for the dad with the highest qualification

13. Child's mum's age is...     
  Up to 20 years old     21-25 years old     26 to 30 years old     31-35 years old     36+ years old

14. Mum's highest education is...     
  No formal qualifications     1-4 GCSEs/O Levels (**at any grade**) NVQ Level 1 or similar     5+ GCSEs (**grades A\*-C**)/ O levels (**passes**)/NVQ level 2 or similar     1 A Level/ 2-3 AS Levels     2+ A Levels/NVQ Level 3 or similar     University degree/HND/HNC/NVQ Level 4 or 5/similar     Postgraduate degree or similar e.g. (PGCE, PhD, MA etc.)

**Child's Dad**

Please fill in questions 15 and 16 for the child's dad.

NB If child lives with two mums (and not dad), please fill in for the 2<sup>nd</sup> mum here. If child lives with two dads (and not mum), please fill in for the 2<sup>nd</sup> dad here

15. Child's dad's age is... Up to 20 years old  21-25 years old   
26 to 30 years old  31-35 years old  36+ years old

16. Dad's highest education is... No formal qualifications  1-4 GCSEs/O Levels (**at any grade**) NVQ Level 1 or similar   
5+ GCSEs (**grades A\*-C**)/O levels (**passes**)/NVQ level 2 or similar  1 A Level/ 2-3 AS Levels  2+ A Levels/NVQ Level 3 or similar   
University degree/HND/HNC/NVQ Level 4 or 5/similar  Postgraduate degree or similar e.g. (PGCE, PhD, MA etc.)

17. What is the overall household income **before tax** in your child's main home? Please include all tax credits in your calculation.  
£0-14,000  £14,000-£24,000  £24,000-£42,000  £42,000 or more

**C. ALL ABOUT YOUR CHILD'S DAY**

1. Who looks after your child? Please tell us about everyone who looks after your child for at least half a day in a typical week  
Child's mum  Child's dad  Other carer or carers

2. If you have told us about other carers, are they:  
Family  Childminder  Nursery

3. If other carers, how many hours in total do these other carers look after your child in a typical week?  
1-20 hours  21-35 hours  36+ hours

4. Does your child regularly hear a language that is not English? Yes  No

5. If yes, for how many hours does your child hear this other language in a typical week?

**You have finished! Thank you very much for your time and effort.**
