# Supplementary material
Source: publisher figshare collection journal article supplement (https://asha.figshare.com/articles/dataset/_/12420539)
Supplement: Supplementary file 4 [file 1]

## **Supplemental Material S9.** Caregiver book reading behaviors coding scheme.

### 1. Dialogic Reading

After each 30 second section of the video code whether that 30 second contained,

- Any evidence of dialogic book reading (i.e., elements of PEER and CROWD)
  - a. Prompts
    - i. Completion prompt
    - ii. Recall prompt
    - iii. Wh-question
    - iv. Distancing question
  - b. Evaluates
  - c. Expands
  - d. Repeats

If there is evidence of the target book reading behavior score = 1. If there is no evidence of target book reading behavior score = 0.

### 2. Pause Reading

After each 30 second section of the video code whether that 30 second contained,

- Any evidence of pause reading (i.e., elements of PROB and open questions)
  - a. Pause at page turn
  - b. Open questions
    - i. Open question – why
    - ii. Open question – tell me
    - iii. Open question – what
    - iv. Open question – how
    - v. Open question - I wonder
    - vi. Open question – other

If there is evidence of the target book reading behavior score = 1. If there is no evidence of target book reading behavior score = 0.
