# Supplementary material
Source: publisher figshare collection journal article supplement (https://asha.figshare.com/articles/dataset/_/12420539)
Supplement: Supplementary file 5 [file 1]

**Supplemental Material S11. Regression models using postintervention parental reading scores as the fidelity measure.**

**Expressive language**

| Term                                                     | $\beta$                | SE   | t       | p    |
|----------------------------------------------------------|------------------------|------|---------|------|
| Intercept                                                | 1.31 [0.58, 2.58]      | 0.51 | 2.56    | .011 |
| Pause vs. Dialogic                                       | 0.8 [-1.74, 2.37]      | 1.05 | 0.76    | .440 |
| Control vs. Intervention                                 | 3.5e-03 [-1.4, 1.81]   | 0.82 | 4.2e-03 | .997 |
| Pre-Intervention Score                                   | -0.13 [-0.25, 1.3e-03] | 0.06 | -1.97   | .049 |
| SES                                                      | 0.27 [-1.12, 1.1]      | 0.57 | 0.48    | .629 |
| Dialogic Score                                           | -4.33 [-7.78, -0.93]   | 1.75 | -2.47   | .017 |
| Pause Score                                              | 4.78 [0.94, 8.5]       | 1.93 | 2.48    | .015 |
| Pause vs. Dialogic $\times$ Pre-Intervention Score       | -0.06 [-0.39, 0.25]    | 0.16 | -0.37   | .705 |
| Pause vs. Dialogic $\times$ SES                          | -0.48 [-2.52, 2.6]     | 1.31 | -0.37   | .721 |
| Pause vs. Dialogic $\times$ Dialogic Score               | 5.88 [-2.99, 14.27]    | 4.40 | 1.33    | .172 |
| Pause vs. Dialogic $\times$ Pause Score                  | -1.31 [-9.39, 7.3]     | 4.26 | -0.31   | .754 |
| Control vs. Intervention $\times$ Pre-Intervention Score | -9.2e-03 [-0.19, 0.16] | 0.09 | -0.1    | .914 |
| Control vs. Intervention $\times$ SES                    | 0.17 [-1.64, 1.6]      | 0.83 | 0.2     | .839 |
| Control vs. Intervention $\times$ Dialogic Score         | -1.31 [-6.24, 3.44]    | 2.47 | -0.53   | .590 |
| Control vs. Intervention $\times$ Pause Score            | 2.39 [-3.34, 8.48]     | 3.01 | 0.79    | .420 |

F(14, 122) = 1.11 [-1.66, 1.5],  $p = .359$ ,  $R^2 = 0.1126$ ,  $N = 137$

## Receptive language

| Term                                                     | $\beta$               | <i>SE</i> | <i>t</i> | <i>p</i> |
|----------------------------------------------------------|-----------------------|-----------|----------|----------|
| Intercept                                                | 1.65 [1.18, 3.66]     | 0.63      | 2.59     | .010     |
| Pause vs. Dialogic                                       | 2.83 [-0.87, 5.62]    | 1.66      | 1.71     | .089     |
| Control vs. Intervention                                 | 0.48 [-0.42, 2.78]    | 0.81      | 0.58     | .557     |
| Pre-Intervention Score                                   | -0.27 [-0.42, -0.13]  | 0.07      | -3.73    | < .001   |
| SES                                                      | 0.83 [-1.37, 1.34]    | 0.69      | 1.20     | .228     |
| Dialogic Score                                           | -3.08 [-7.81, 2.09]   | 2.53      | -1.22    | .214     |
| Pause Score                                              | 2.32 [-2.79, 7.18]    | 2.54      | 0.91     | .353     |
| Pause vs. Dialogic $\times$ Pre-Intervention Score       | -0.02 [-0.42, 0.39]   | 0.21      | -0.07    | .942     |
| Pause vs. Dialogic $\times$ SES                          | -0.28 [-3.48, 3.65]   | 1.82      | -0.15    | .878     |
| Pause vs. Dialogic $\times$ Dialogic Score               | -0.46 [-13.15, 14.68] | 7.10      | -0.06    | .943     |
| Pause vs. Dialogic $\times$ Pause Score                  | 1.82 [-12.29, 14.67]  | 6.88      | 0.26     | .794     |
| Control vs. Intervention $\times$ Pre-Intervention Score | 0.02 [-0.16, 0.19]    | 0.09      | 0.23     | .814     |
| Control vs. Intervention $\times$ SES                    | 0.73 [-1.75, 1.72]    | 0.89      | 0.83     | .413     |
| Control vs. Intervention $\times$ Dialogic Score         | -8.15 [-13.33, -1.92] | 2.91      | -2.80    | .007     |
| Control vs. Intervention $\times$ Pause Score            | 9.2 [2.56, 15.22]     | 3.23      | 2.85     | .006     |

$F(14, 122) = 1.11 [-1.66, 1.5], p = .359, R^2 = 0.1126, N = 137$

### CELF (syntax comprehension) scores

| Term                                                     | $\beta$              | <i>SE</i> | <i>t</i> | <i>p</i> |
|----------------------------------------------------------|----------------------|-----------|----------|----------|
| Intercept                                                | 0.88 [0.15, 2.74]    | 0.66      | 1.33     | .183     |
| Pause vs. Dialogic                                       | 2.04 [-0.95, 4.89]   | 1.49      | 1.37     | .169     |
| Control vs. Intervention                                 | -0.5 [-2.02, 1.9]    | 1.00      | -0.50    | .612     |
| Pre-Intervention Score                                   | -0.38 [-0.53, -0.22] | 0.08      | -4.87    | < .001   |
| SES                                                      | 0.53 [-1.49, 1.47]   | 0.76      | 0.70     | .481     |
| Dialogic Score                                           | -1.67 [-6.56, 2.74]  | 2.37      | -0.70    | .468     |
| Pause Score                                              | 3.2 [-2.09, 8.65]    | 2.74      | 1.17     | .233     |
| Pause vs. Dialogic $\times$ Pre-Intervention Score       | 0.37 [0.02, 0.73]    | 0.18      | 2.04     | .042     |
| Pause vs. Dialogic $\times$ SES                          | -0.22 [-3.68, 3.56]  | 1.85      | -0.12    | .907     |
| Pause vs. Dialogic $\times$ Dialogic Score               | 8.44 [-4.76, 19.57]  | 6.21      | 1.36     | .171     |
| Pause vs. Dialogic $\times$ Pause Score                  | -11.9 [-23.23, 0.57] | 6.07      | -1.96    | .050     |
| Control vs. Intervention $\times$ Pre-Intervention Score | 0.07 [-0.16, 0.29]   | 0.11      | 0.61     | .532     |
| Control vs. Intervention $\times$ SES                    | 0.39 [-2.07, 2.13]   | 1.07      | 0.36     | .713     |
| Control vs. Intervention $\times$ Dialogic Score         | -5.46 [-11.85, 0.46] | 3.14      | -1.74    | .080     |
| Control vs. Intervention $\times$ Pause Score            | 5.63 [-2.44, 14.26]  | 4.26      | 1.32     | .180     |

$F(14, 113) = 2.21 [-1.11, 3.08], p = .011, R^2 = 0.2153, N = 128$

### MLU (syntax production) scores

| Term                                                     | $\beta$             | <i>SE</i> | <i>t</i> | <i>p</i> |
|----------------------------------------------------------|---------------------|-----------|----------|----------|
| Intercept                                                | 0.05 [-0.73, 0.62]  | 0.34      | 0.15     | .781     |
| Pause vs. Dialogic                                       | 0.3 [-0.93, 1.68]   | 0.67      | 0.45     | .396     |
| Control vs. Intervention                                 | 0.14 [-1.04, 1.19]  | 0.57      | 0.25     | .638     |
| Pre-Intervention Score                                   | -0.17 [-0.78, 0.45] | 0.32      | -0.54    | .419     |
| SES                                                      | -0.05 [-0.85, 0.91] | 0.45      | -0.11    | .834     |
| Dialogic Score                                           | -0.58 [-3.2, 2.23]  | 1.39      | -0.42    | .375     |
| Pause Score                                              | 0.66 [-1.97, 2.79]  | 1.21      | 0.55     | .365     |
| Pause vs. Dialogic $\times$ Pre-Intervention Score       | 0.44 [-1.21, 2.04]  | 0.83      | 0.53     | .394     |
| Pause vs. Dialogic $\times$ SES                          | 0.13 [-2.08, 2.27]  | 1.11      | 0.12     | .787     |
| Pause vs. Dialogic $\times$ Dialogic Score               | 0.93 [-4.47, 6.71]  | 2.85      | 0.32     | .515     |
| Pause vs. Dialogic $\times$ Pause Score                  | -0.49 [-5.49, 4.19] | 2.47      | -0.20    | .761     |
| Control vs. Intervention $\times$ Pre-Intervention Score | -0.02 [-0.91, 0.72] | 0.42      | -0.04    | .959     |
| Control vs. Intervention $\times$ SES                    | -0.11 [-1.27, 1.2]  | 0.63      | -0.17    | .749     |
| Control vs. Intervention $\times$ Dialogic Score         | 0.55 [-3.72, 4.91]  | 2.20      | 0.25     | .496     |
| Control vs. Intervention $\times$ Pause Score            | -0.05 [-3.64, 4.1]  | 1.97      | -0.03    | .952     |

$F(14, 33) = 0.96 [-4.52, 2.43], p = .514, R^2 = 0.2888, N = 48$
