# Supplementary material
Source: publisher figshare collection journal article supplement (https://asha.figshare.com/articles/dataset/_/12420539)
Supplement: Supplementary file 6 [file 1]

## Box 1 - Dialogic Reading

### PEER Sequence

Prompt the child to say something about the book – e.g. point to something in the picture and ask,

*What is that?*

Evaluate the child's response - Think about what your child just said. Was the answer correct? If it was correct let your child know. If your child gave the wrong answer, gently provide the correct answer e.g. *That's right*

Expand the child's response by rephrasing and adding information to it e.g. *It's a witch flying on a broomstick.*

Repeat the prompt to make sure the child has learned from the expansion. Ask your child to repeat your expanded or corrected answer e.g. *Can you say that?* OR *what is it again?* OR *can you say it's a witch flying on a broomstick*

### CROWD Prompts

Completion prompts - Allow your child to finish off your sentence with a well-known word or phrase from the book. E.g. *The witch had a cat and a very long \_\_\_\_\_ (hat).*

Recall prompts - Ask your child about what happens in the story. E.g. *What happens when all the animals get onto the broom?*

Open-ended prompts - Ask your child an open-ended question about what is happening in the pictures – e.g. *what's going on in this picture?'*

Wh- prompts -

Ask your child questions about the story or pictures which start with '*who, what, where, why, when and how*'. You can point to something in the book and ask your child to name the object or the action. E.g. *What is coming out of the dragon's nose?*

Distancing prompts - Ask your child questions that link something in the story to your child's own life. E.g. *Do you remember when we went to the Halloween party? What did everyone dress up as?*
