# Supplementary material
Source: publisher figshare collection journal article supplement (https://asha.figshare.com/articles/dataset/_/12420539)
Supplement: Supplementary file 9 [file 1]

## Box 2 - Pause Reading

### PROB Sequence

Pause at each page turn to let the child initiate a conversation. At each page turn, stop and give your child 10 seconds to talk first. If your child doesn't start a conversation after 10 seconds, skip to asking an open question (see below)

Respond to what the child says or points to. Comment on, describe or label what your child has shown interest in. You can even imitate exactly what they said. E.g. *That's right*

Open-ended questions. Ask a contingent open-ended question. Ask your child an open question which is related to your child's chosen topic to encourage them to say more. E.g. *What do think will happen to Winnie Witch now?*

Boost what the child says by rephrasing or adding a little more information to it. Add a few words to what your child said by rephrasing or adding a little more information to it. E.g. If your child says, *witch* you could say, *Yes, that's right she's called Winnie the Witch.*

### Open Questions

Why questions e.g. why do you think...

Tell me prompts e.g. Tell me about this picture...

What questions e.g. What do you think...

How questions e.g. How do you know...

I wonder questions e.g. I wonder what's happening in this picture...
