# Supplementary material
Source: publisher figshare collection journal article supplement (https://asha.figshare.com/articles/dataset/_/12420539)
Supplement: Supplementary file 10 [file 1]

**Supplemental Material S2.** List of books used in study.

1. Always There Bear – Trudi Granger
2. Lunchtime – Rebecca Cobb
3. Tilly and friends - Let's get Wheeling – Polly Dunbar
4. Usborne Farmyard Tales - The Naughty Sheep - Heather Amery and Stephen Cartwright
5. On Sudden Hill – Linda Sarah and Benji Davies
6. Freddie and the Fairy – Julia Donaldson and Karen George
7. Maisy goes to nursery - Lucy Cousins
8. Alfie's Numbers – Shirley Hughes
9. Shoo – Michael Rose and Johnathan Langley
10. Pip and Posy the Super Scooter – Axel Scheffler
11. The crocodile who didn't like water – Gemma Merino
12. Smile Baby Smile – Moira Butterfield
13. The Storm Whale – Benji Davies
14. Jack Frost – Kazuno Kohara
15. Good Little Wolf - Nadia Shireen
16. Maisy goes to the City – Lucy Cousins
17. Pip and Posy the Big Balloon – Axel Scheffler
18. Pip and Posy the snowy day - – Axel Scheffler
19. Never Shake a Rattlesnake – Michaela Morgan and Nick Sharratt
20. Usborne Farmyard Tales - Scarecrow's secret – Heather Amery and Stephen Cartwright
