# Supplementary material
Source: publisher figshare collection journal article supplement (https://asha.figshare.com/articles/dataset/_/12420539)

Week:  Day:  Book:

## 8. Alfie's Numbers

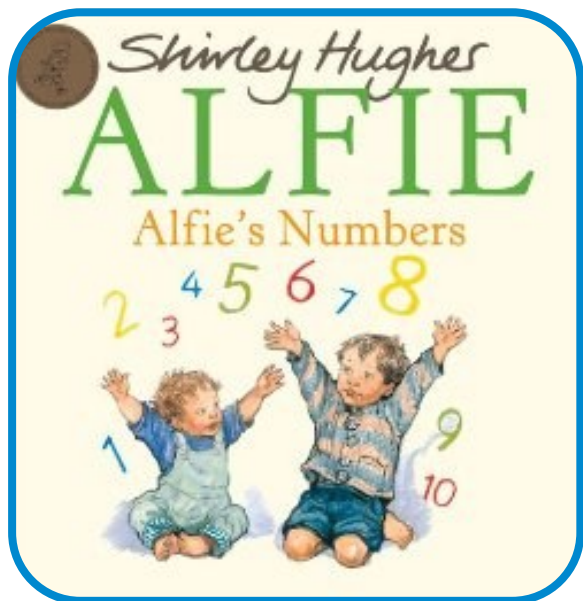

Comments:

---

---

---

---

---

Put a sticker  
here when you  
have read the  
book!

Supplement: Supplementary file 7 [file 1]
